# Supplementary material for: The UiO-66-SO3H metal–organic framework as a green catalyst for the facile synthesis of dihydro-2-oxypyrrole derivatives
Source: Royal Society of Chemistry journal article supplement (doi:10.1039/c6ra00463f), 2016-01-01
Supplement: c6ra00463f1.pdf [file c6ra00463f1.pdf]

*Electronic Supplementary Information (ESI)*

**UiO-66-SO<sub>3</sub>H metal-organic framework as a green catalyst  
for facile synthesis of dihydro-2-oxypyrrole derivatives**

Ramin Ghorbani-Vaghei,<sup>\*a</sup> Davood Azarifar,<sup>a</sup> Saba Daliran<sup>a</sup> and Ali Reza Oveisi<sup>b</sup>

<sup>a</sup>*Faculty of Chemistry, Bu-Ali Sina University, Hamedan, Iran*

<sup>b</sup>*Department of Chemistry, Faculty of Science, University of Zabol, Zabol, Iran*

\*Corresponding author: Phone: +989183122123; Fax: +988138380709; E-mail address:

rgvaghei@yahoo.com (Ramin Ghorbani-Vaghei)

| <b>Table of Contents</b>                                                | <b>Page number</b> |
|-------------------------------------------------------------------------|--------------------|
| S1. Characterization data for dimethyl 2-((4-chlorophenyl)amino)maleate | <i>S1</i>          |
| S2. Characterization data for <b>1a</b>                                 | <i>S2</i>          |
| S3. Characterization data for <b>2a</b>                                 | <i>S3</i>          |
| S4. Characterization data for <b>3a</b>                                 | <i>S4</i>          |
| S5. Characterization data for <b>4a</b>                                 | <i>S5</i>          |
| S6. Characterization data for <b>5a</b>                                 | <i>S6</i>          |
| S7. Characterization data for <b>6a</b>                                 | <i>S7</i>          |
| S8. Characterization data for <b>7a</b>                                 | <i>S9</i>          |
| S9. Characterization data for <b>8a</b>                                 | <i>S10</i>         |
| S10. Characterization data for <b>9a</b>                                | <i>S11</i>         |
| S11. Characterization data for <b>10a</b>                               | <i>S13</i>         |

**S1. Characterization data for dimethyl 2-((4-chlorophenyl)amino)maleate.**

Pale yellow solid, mp: decomposed at 305°C.  $^1\text{H}$  NMR (DMSO- $d_6$ , 300 MHz):  $\delta_{\text{H}}$ (ppm) 9.77 (br, s, 1H, NH), 8.13 (d, 2H,  $^3J = 8.7$  Hz, Ar-H), 7.05 (d, 2H,  $^3J = 8.7$  Hz, Ar-H), 5.75 (s, 1H, =CH), 3.74 (s, 3H, OCH<sub>3</sub>), 3.67 (s, 3H, OCH<sub>3</sub>).

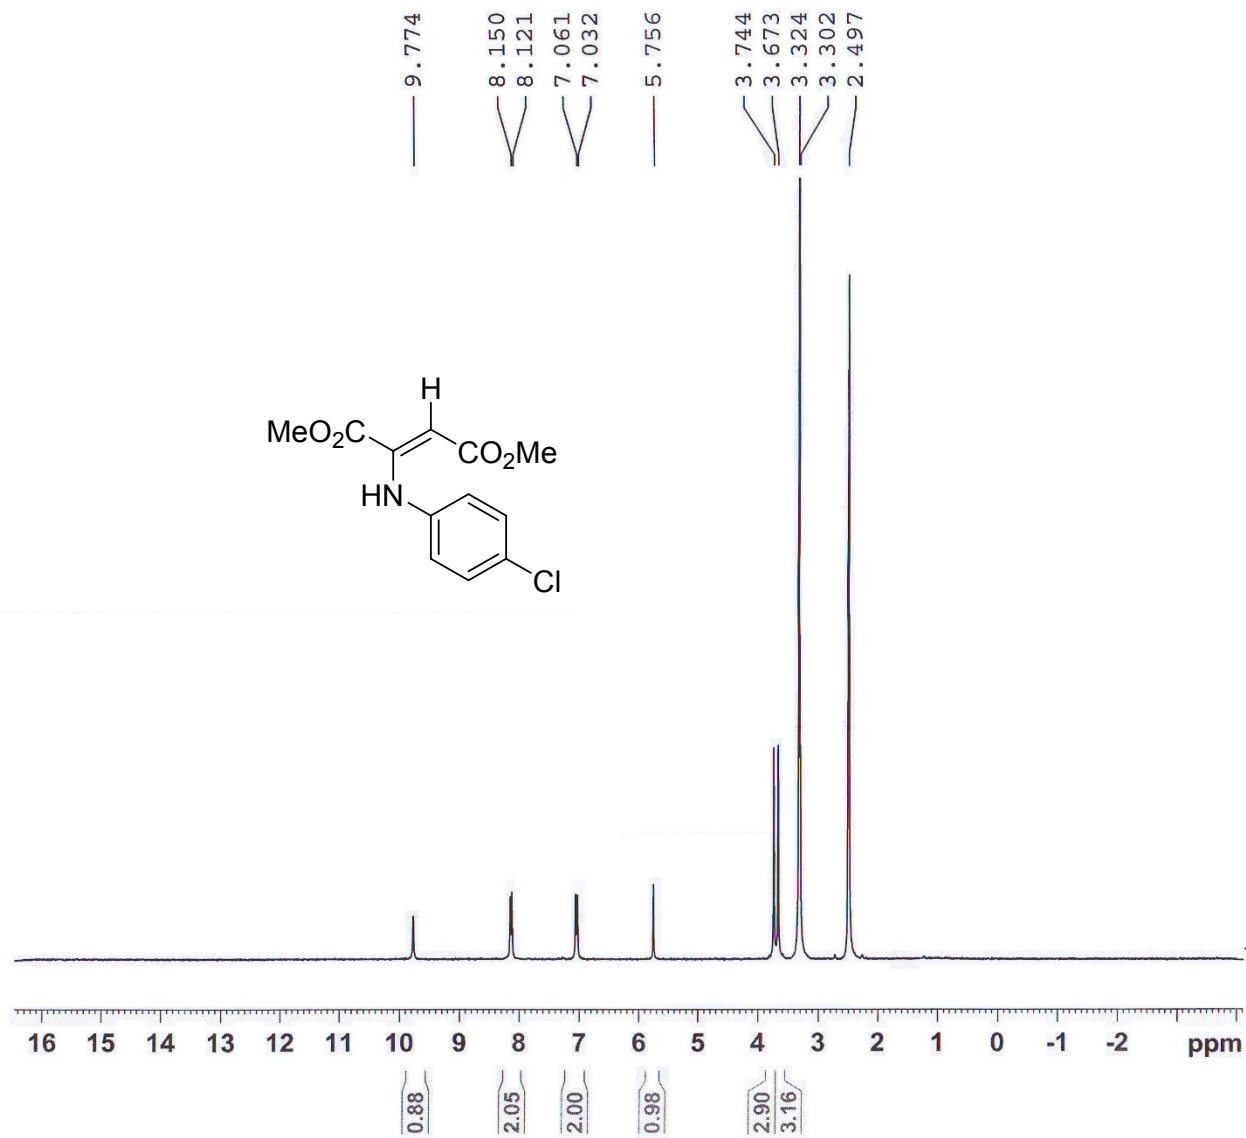

**Fig. S1** The  $^1\text{H}$  NMR (300MHz) spectrum of dimethyl 2-((4-chlorophenyl)amino)maleate

**S2. Characterization data for methyl 1-(4-chlorophenyl)-4-((4-chlorophenyl)amino)-5-oxo-2,5-dihydro-1H-pyrrole-3-carboxylate 1a (Table 3, Entry 1):**

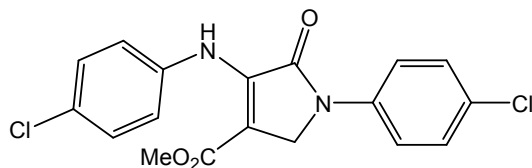

Cream solid, mp: 174-175 °C (lit.: 175-176 °C [3]). FT-IR (KBr):  $\bar{\nu}$ (cm<sup>-1</sup>) 3275, 1693, 1634, 1594, 1546, 1493, 1454, 1362, 1263, 1137, 826, 756. <sup>1</sup>H NMR (CDCl<sub>3</sub>, 250 MHz):  $\delta_H$ (ppm) 7.97 (br, s, 1H, NH), 7.66 (d, 2H, <sup>3</sup>J= 9.25 Hz, Ar-H), 7.28 (d, 2H, <sup>3</sup>J= 8 Hz, Ar-H), 7.21 (d, 2H, <sup>3</sup>J=8.26 Hz, Ar-H), 7.00 (d, 2H, <sup>3</sup>J= 8.6 Hz, Ar-H), 4.43 (s, 2H, NCH<sub>2</sub>), 3.71 (s, 3H, OCH<sub>3</sub>).

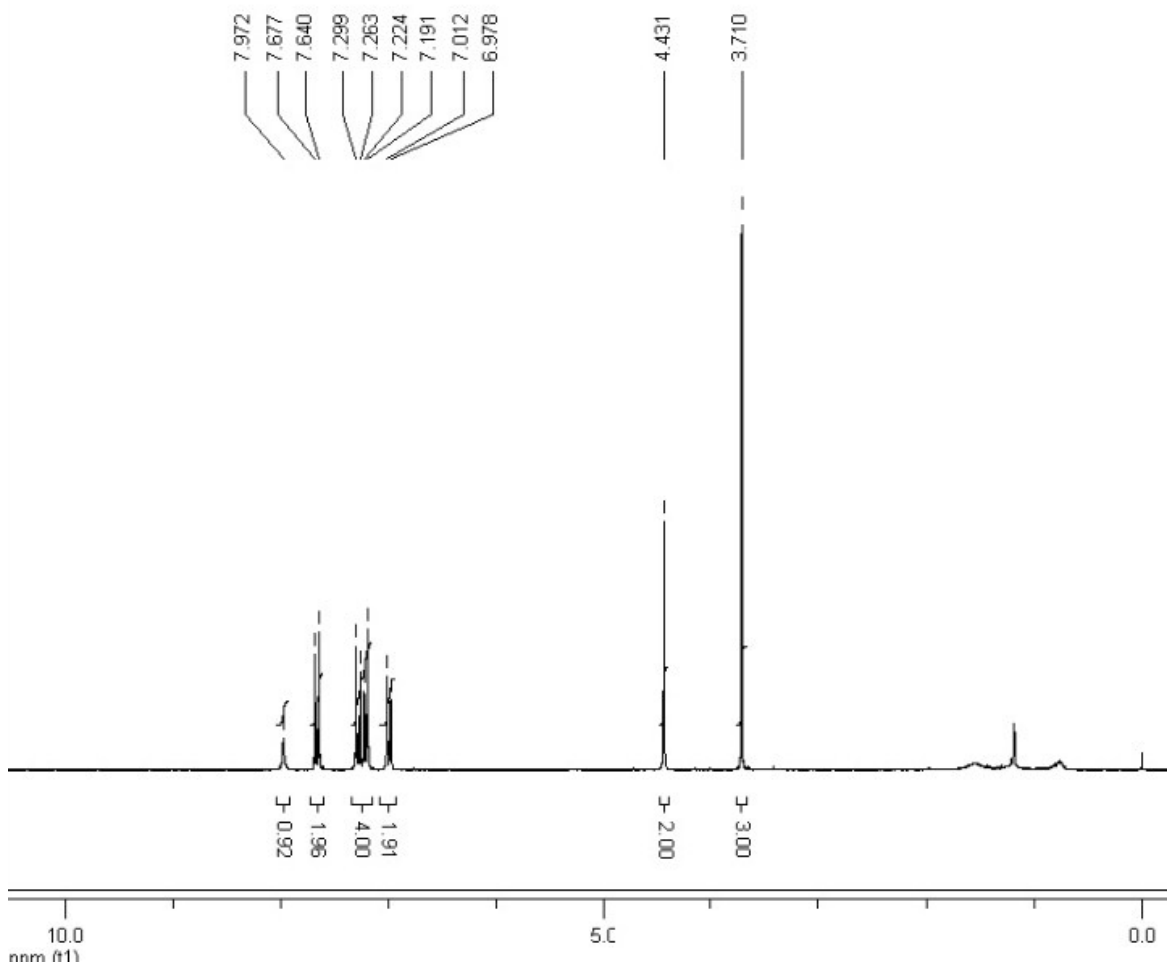

**Fig. S2** The <sup>1</sup>H NMR(250MHz)spectrum of product (**1a**)

**S3. Characterization data for methyl 5-oxo-1-(p-tolyl)-4-(p-tolylamino)-2,5-dihydro-1H-pyrrole-3-carboxylate 2a (Table 3, Entry 2):**

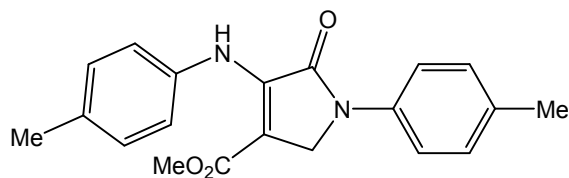

Pale yellow solid, mp: 176-177 °C (lit.: 175-176 °C [3]). FT-IR (KBr):  $\bar{\nu}$  (cm<sup>-1</sup>) 3282, 1685, 1657, 1544, 1439, 1360, 1300, 1132. <sup>1</sup>H NMR (CDCl<sub>3</sub>, 250 MHz):  $\delta_H$ (ppm) 7.93 (br, s, 1H, NH), 7.68 (d, 2H, <sup>3</sup>J= 8.76 Hz, Ar-H), 7.19 (s, 2H, Ar-H), 7.11 (d, 2H, <sup>3</sup>J= 8.76 Hz, Ar-H), 7.00 (d, 2H, <sup>3</sup>J= 12.76 Hz, Ar-H), 4.43 (s, 2H, NCH<sub>2</sub>), 3.67 (s, 3H, OCH<sub>3</sub>), 2.26 (s, 6H, Ar-Me).

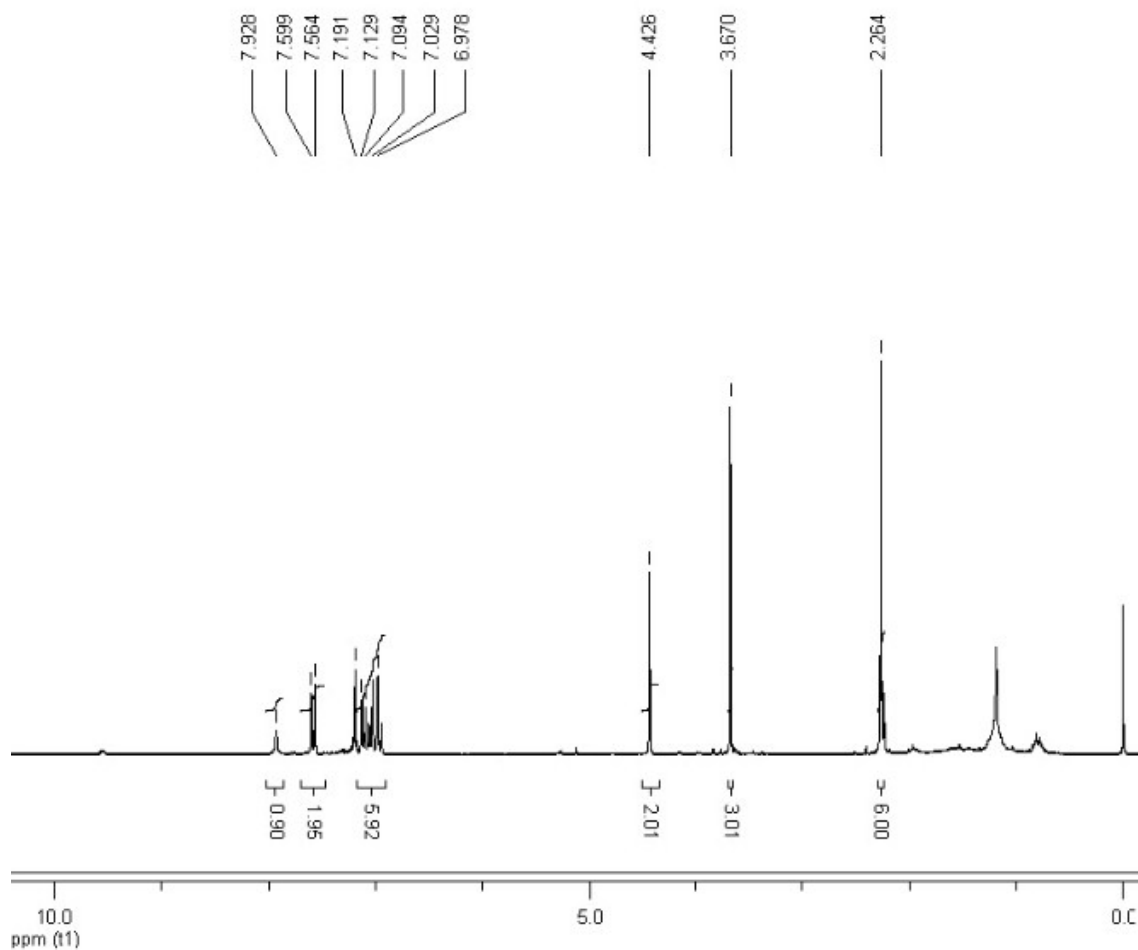

**Fig. S3** The <sup>1</sup>H NMR(250MHz)spectrum of product (**2a**)

**S4. Characterization data for methyl 1-(4-methoxyphenyl)-4-((4-methoxyphenyl)amino)-5-oxo-2,5-dihydro-1H-pyrrole-3-carboxylate **3a** (Table 3, Entry 3):**

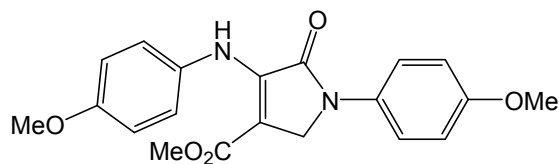

White solid, mp: 161-162 °C (lit.: 160-162 °C [3]). FT-IR (KBr):  $\bar{\nu}$  (cm<sup>-1</sup>) 3282, 1685, 1657, 1543, 1513, 1402, 1300, 1034. <sup>1</sup>H NMR (CDCl<sub>3</sub>, 300 MHz):  $\delta_H$ (ppm) 8.01 (br, s, 1H, NH), 7.67 (d, 2H, <sup>3</sup>J = 8 Hz, Ar-H), 7.11 (d, 2H, <sup>3</sup>J = 8.7 Hz, Ar-H), 6.93-6.84 (m, 4H, Ar-H), 4.48 (s, 2H, NCH<sub>2</sub>), 3.82 (s, 6H, OCH<sub>3</sub>), 3.75 (s, 3H, OCH<sub>3</sub>).

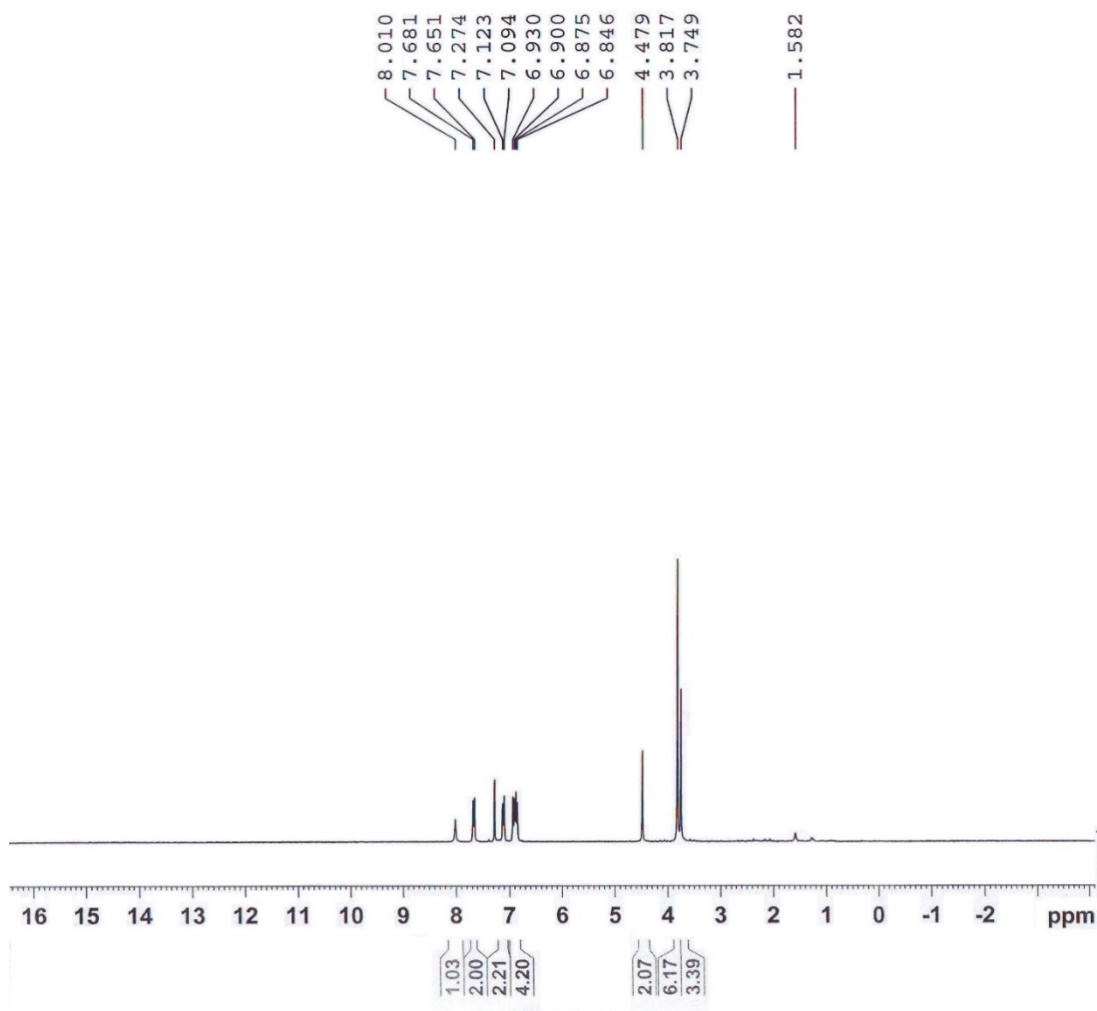

**Fig. S4** The <sup>1</sup>H NMR(300MHz)spectrum of product (**3a**)

**S5. Characterization data for methyl 1-(4-bromophenyl)-4-((4-bromophenyl)amino)-5-oxo-2,5-dihydro-1H-pyrrole-3-carboxylate 4a (Table 3, Entry 4):**

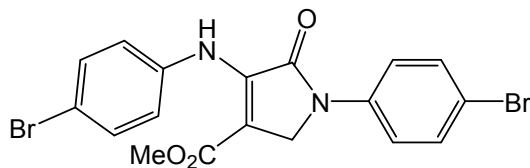

White solid, mp: 180-182 °C (lit.: 181-182 °C [3]). FT-IR (KBr):  $\bar{\nu}$  (cm<sup>-1</sup>) 3274, 1691, 1651, 1533, 1353, 1217, 813. <sup>1</sup>H NMR (CDCl<sub>3</sub>, 300 MHz):  $\delta_H$  (ppm) 8.05 (br, s, 1H, NH), 7.74 (d, 2H, <sup>3</sup>J= 8.7 Hz, Ar-H), 7.34-7.27 (m, 4H, Ar-H), 7.07 (d, 2H, <sup>3</sup>J=8.4 Hz, Ar-H), 4.51 (s, 2H, NCH<sub>2</sub>), 3.79 (s, 3H, OCH<sub>3</sub>).

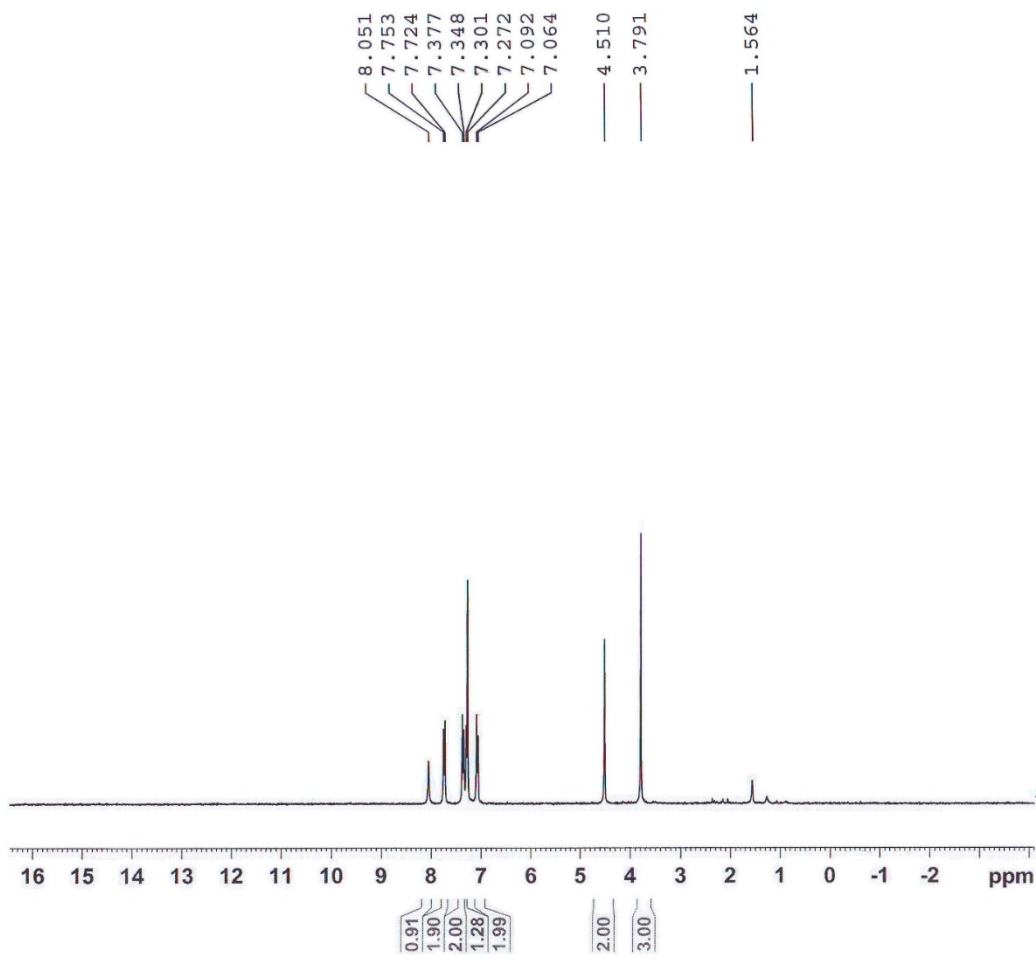

**Fig. S5** The <sup>1</sup>H NMR(300MHz)spectrum of product (**4a**)

**S6. Characterization data for methyl 5-oxo-1-phenyl-4-(phenylamino)-2,5-dihydro-1H-pyrrole-3-carboxylate 5a (Table 3, Entry 5):**

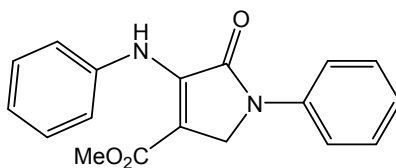

Yellow solid, mp: 160-161 °C (lit.: 160-162 °C [3]). FT-IR (KBr):  $\bar{\nu}$  (cm<sup>-1</sup>) 3285, 1684, 1648, 1510, 1444, 1437, 1267, 1242, 841. <sup>1</sup>H NMR (CDCl<sub>3</sub>, 250 MHz):  $\delta_H$ (ppm) 7.94 (br, s, 1H, NH), 7.73-7.69 (m, 2H, Ar-H), 7.36-7.05 (m, 8H, Ar-H), 4.47 (s, 2H, NCH<sub>2</sub>), 3.67 (s, 3H, OCH<sub>3</sub>).

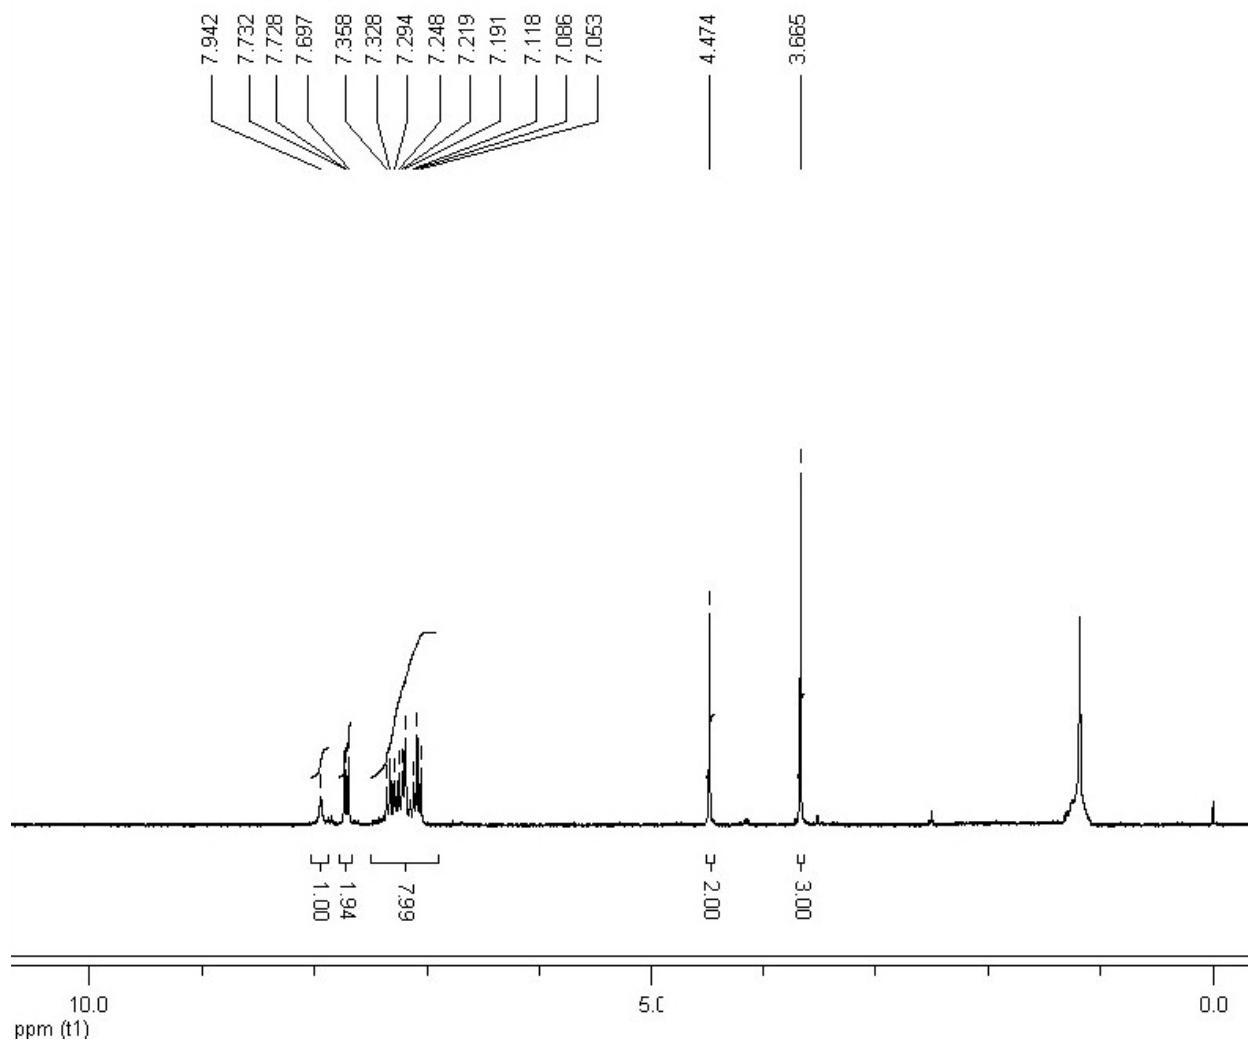

**Fig. S6** The <sup>1</sup>H NMR(250MHz)spectrum of product (**5a**)

S7. Characterization data for methyl 5-oxo-2-phenyl-1-(p-tolyl)-4-(p-tolylamino)-2,5-dihydro-1H-pyrrole-3-carboxylate **6a** (Table 3, Entry 6):

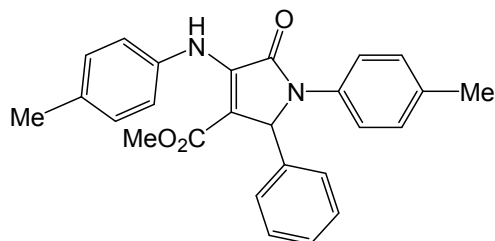

White solid, mp: 167-168 °C. FT-IR (KBr):  $\bar{\nu}$  (cm<sup>-1</sup>) 3274, 1691, 1651, 1533, 1514, 1391, 1353, 1217, 811. <sup>1</sup>H NMR (CDCl<sub>3</sub>, 250 MHz):  $\delta_H$ (ppm) 8.06 (br, s, 1H, NH), 7.23-7.02 (m, 13H, Ar-H), 5.69 (s, 1H, NCH), 3.47 (s, 3H, OCH<sub>3</sub>), 2.26 (s, 3H, Ar-Me), 2.15 (s, 3H, Ar-Me). <sup>13</sup>C NMR (CDCl<sub>3</sub>, 100 MHz):  $\delta_C$ (ppm) 168.14, 166.90, 137.05, 136.15, 135.91, 135.43, 134.63, 133.96, 129.38, 129.02, 128.41, 128.02, 127.58, 123.21, 123.17, 122.72, 63.13, 51.05, 20.99, 20.89. MS (*m/z*): 412.5(M<sup>+</sup>), 379.5, 353.5 (100%), 278.4, 194.4, 158.3, 142.3, 121.3, and 91.3. Elemental anal. Calcd (%) for C<sub>26</sub>H<sub>24</sub>N<sub>2</sub>O<sub>3</sub>: C, 75.71; H, 5.86; N, 6.79. Found: C, 75.72; H, 5.85; N, 6.79.

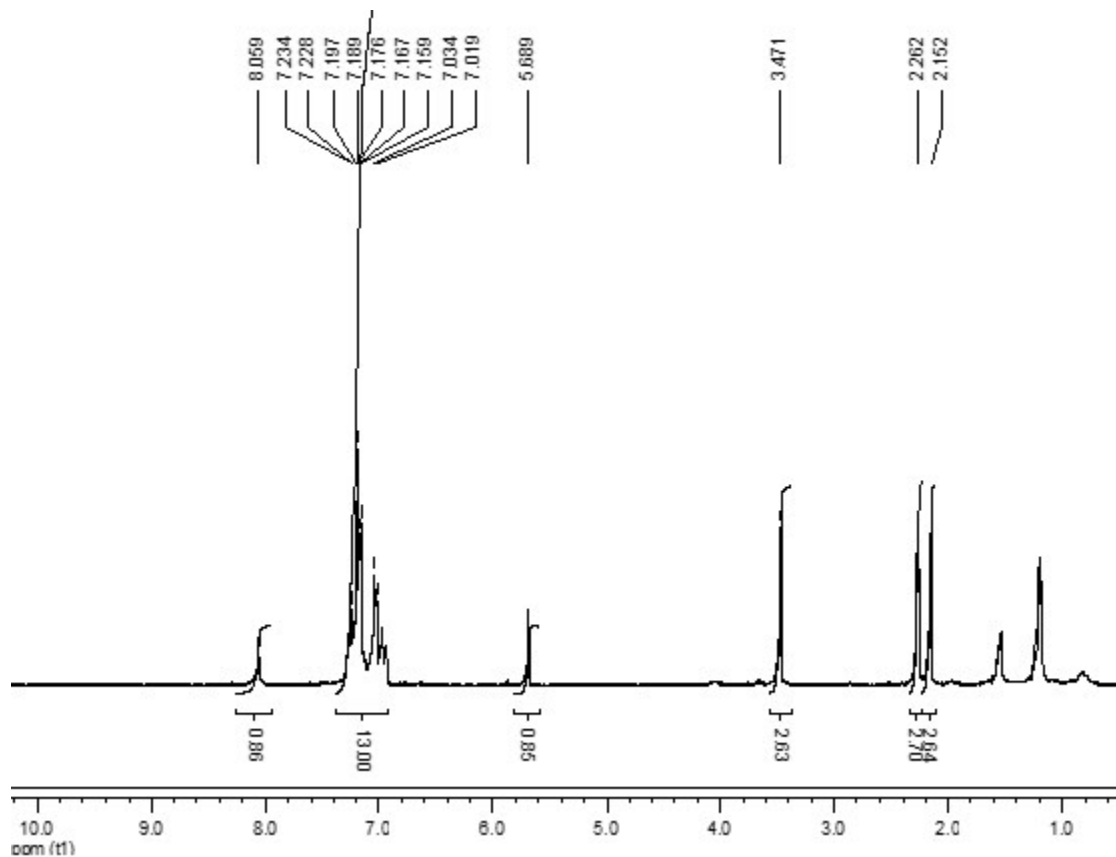

Fig. S7 The <sup>1</sup>H NMR(250MHz)spectrum of product (**6a**)



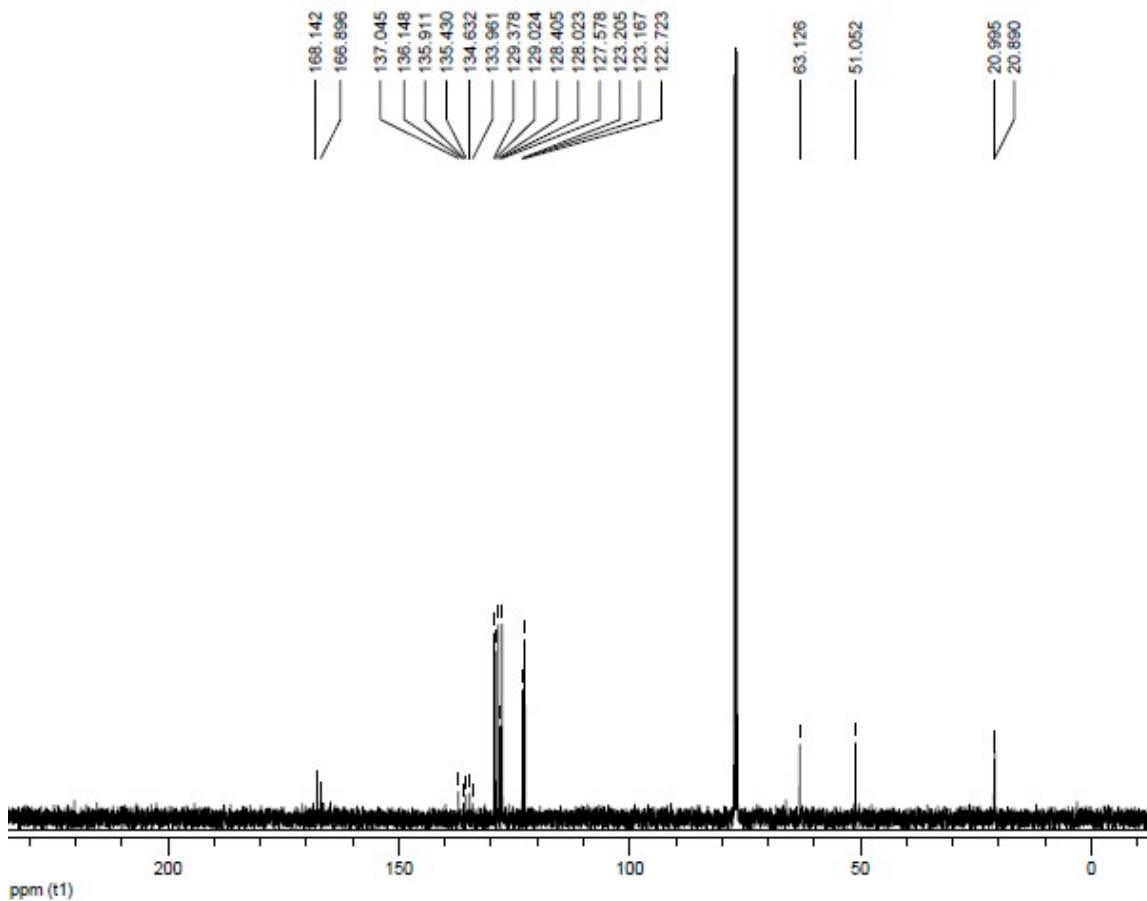

Fig. S8 The  $^{13}\text{C}$  NMR (100MHz) spectrum of product (6a)

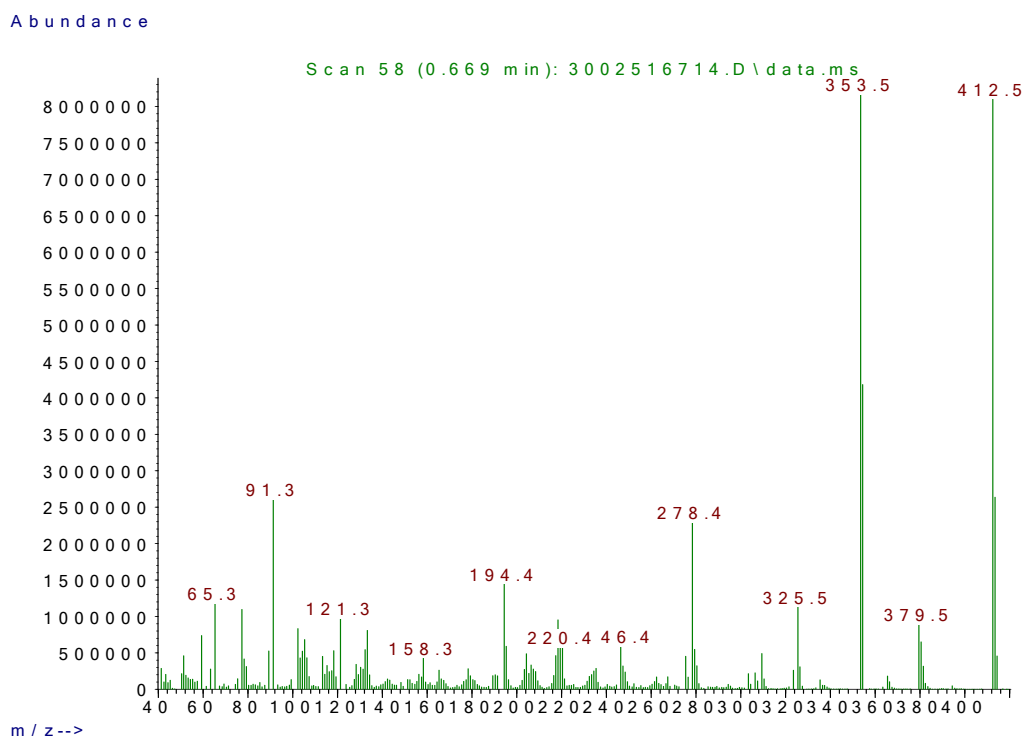

Fig. S9 The MS spectrum of product (6a)

**S8. Characterization data for methyl-(4-chlorophenyl)-4-((4-chlorophenyl)amino)-5-oxo-2-phenyl-2,5-dihydro-1H-pyrrole-3-carboxylate 7a (Table 3, Entry 7):**

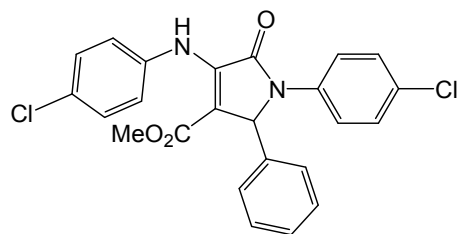

Yellow solid, mp: 176-177 °C (lit.: 175-177 °C [3]). FT-IR (KBr):  $\bar{\nu}$  (cm<sup>-1</sup>) 3289, 1676, 1649, 1537, 1516, 1441, 1399, 1294, 1150, 1224, 1150, 811. <sup>1</sup>H NMR (CDCl<sub>3</sub>, 250 MHz):  $\delta_H$ (ppm) 8.13 (br, s, 1H, NH), 7.36-7.06 (m, 13H, Ar-H), 5.69 (s, 1H, NCH), 3.51 (s, 3H, OCH<sub>3</sub>).

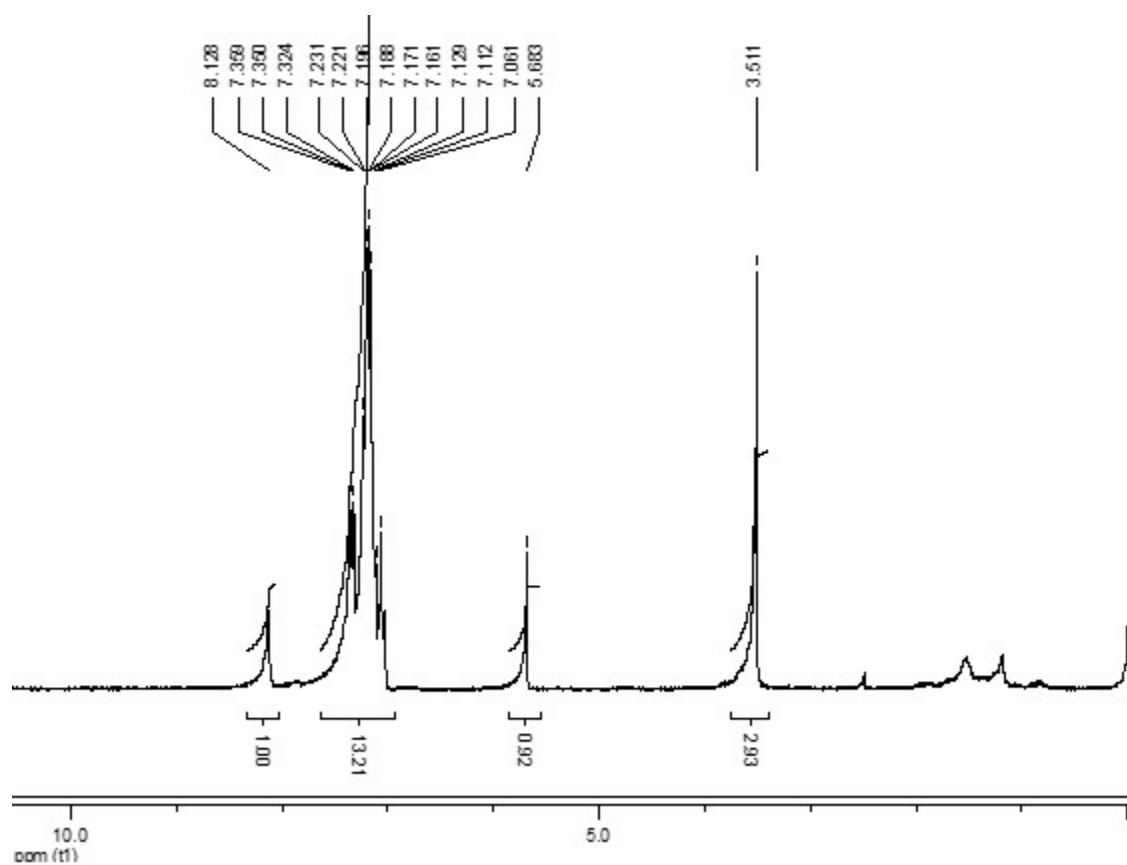

**Fig. S10** The <sup>1</sup>H NMR(250MHz)spectrum of product (**7a**)

**S9. Characterization data for methyl 1-(4-methoxyphenyl)-4-((4-methoxyphenyl)amino)-5-oxo-2-phenyl-2,5-dihydro-1H-pyrrole-3-carboxylate 8a (Table 3, Entry 8):**

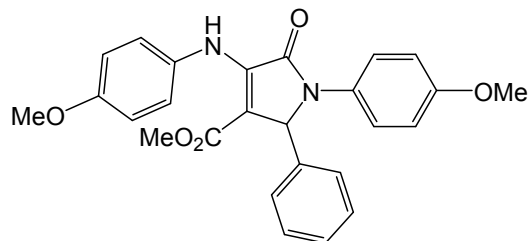

White solid, mp: 167-168 °C. FT-IR (KBr):  $\bar{\nu}$  (cm<sup>-1</sup>) 3282, 1686, 1667, 1544, 1514, 1495, 1439, 1395, 1242, 1232, 1034, 1093, 834. <sup>1</sup>H NMR (CDCl<sub>3</sub>, 250 MHz):  $\delta_H$ (ppm) 8.08 (br, s, 1H, NH), 7.23-7.06 (m, 9H, Ar-H), 6.78 (d, 2H, <sup>3</sup>J=7.6 Hz, Ar-H), 6.68 (d, 2H, <sup>3</sup>J=7.6 Hz, Ar-H), 5.62 (s, 1H, NCH), 3.73 (s, 3H, OCH<sub>3</sub>), 3.64 (s, 3H, OCH<sub>3</sub>), 3.47 (s, 3H, OCH<sub>3</sub>). MS (*m/z*): 444.2 (M<sup>+</sup>), 385.1, 339.1, 294.1, 235.1, 188.1(100%), 160.0, 132.0, and 77.1. Elemental anal. Calcd (%) for C<sub>26</sub>H<sub>24</sub>N<sub>2</sub>O<sub>5</sub>: C, 70.26; H, 5.44; N, 6.30. Found: C, 70.25; H, 5.45; N, 6.31.

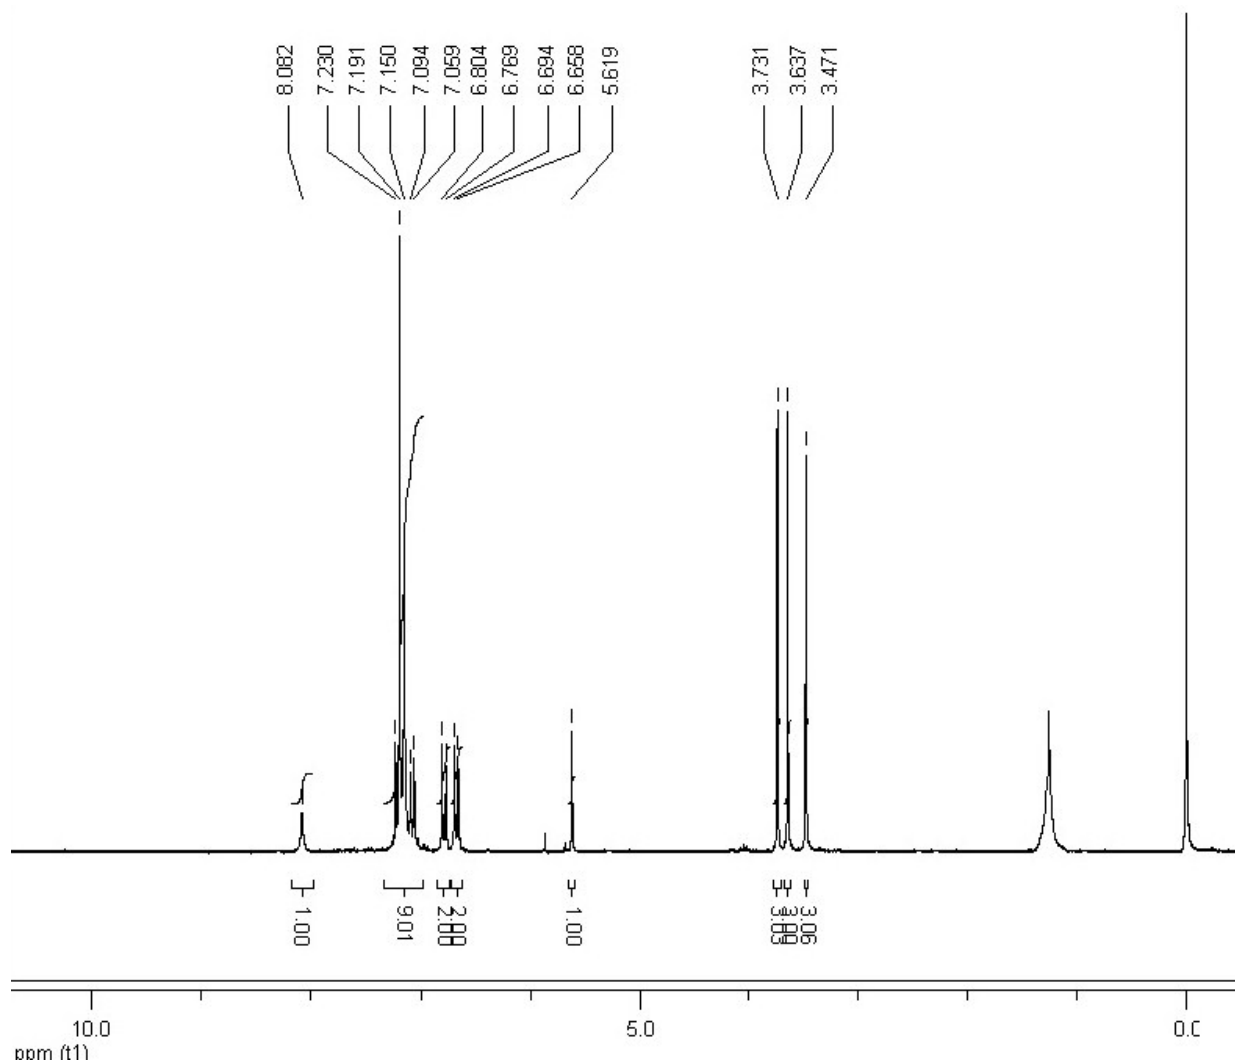

**Fig. S11** The <sup>1</sup>H NMR(250MHz)spectrum of product (**8a**)

Abundance

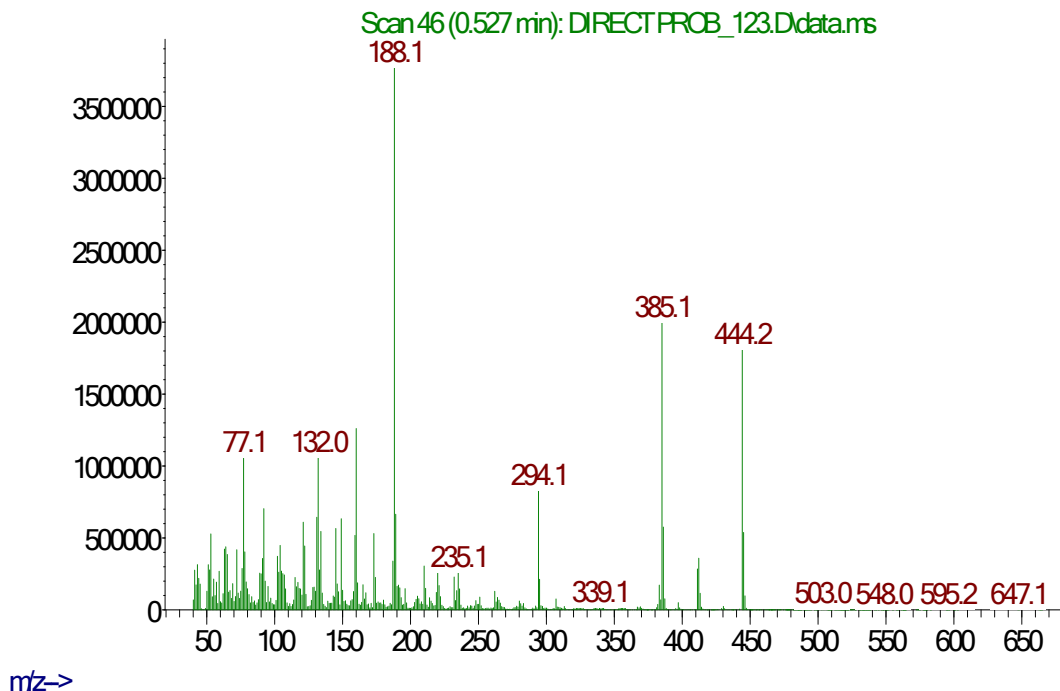

Fig. S12 The MS spectrum of product (8a)

**S10. Characterization data for methyl 5-oxo-1,2-diphenyl-4-(phenylamino)-2,5-dihydro-1H-pyrrole-3-carboxylate 9a (Table 3, Entry 9):**

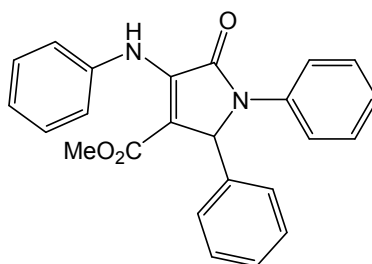

Cream solid, mp: 155-156 °C. FT-IR (KBr):  $\bar{\nu}$  (cm<sup>-1</sup>) 3282, 1685, 1657, 1543, 1513, 1402, 1300, 1242, 1034, 834. <sup>1</sup>H NMR (CDCl<sub>3</sub>, 250 MHz):  $\delta_H$  (ppm) 8.08 (br, s, 1H, NH), 7.41-7.10 (m, 15H, Ar-H), 5.75 (s, 1H, NCH), 3.47 (s, 3H, OCH<sub>3</sub>). <sup>13</sup>C NMR (CDCl<sub>3</sub>, 100 MHz):  $\delta_C$  (ppm) 164.69, 164.00, 138.56, 136.76, 128.83, 128.56, 128.47, 127.56, 126.15, 125.43, 124.84, 124.60, 122.96, 122.76, 109.31, 63.17, 51.13. MS (*m/z*): 384.5 (M<sup>+</sup>), 325.5 (100%), 297.4, 264.4, 232.3, 204.4, 180.4, 144.3, 102.3, and 77.3. Elemental anal. Calcd (%) for C<sub>24</sub>H<sub>20</sub>N<sub>2</sub>O<sub>3</sub>: C, 74.98; H, 5.24; N, 7.29. Found: C, 74.98; H, 5.24; N, 7.29.

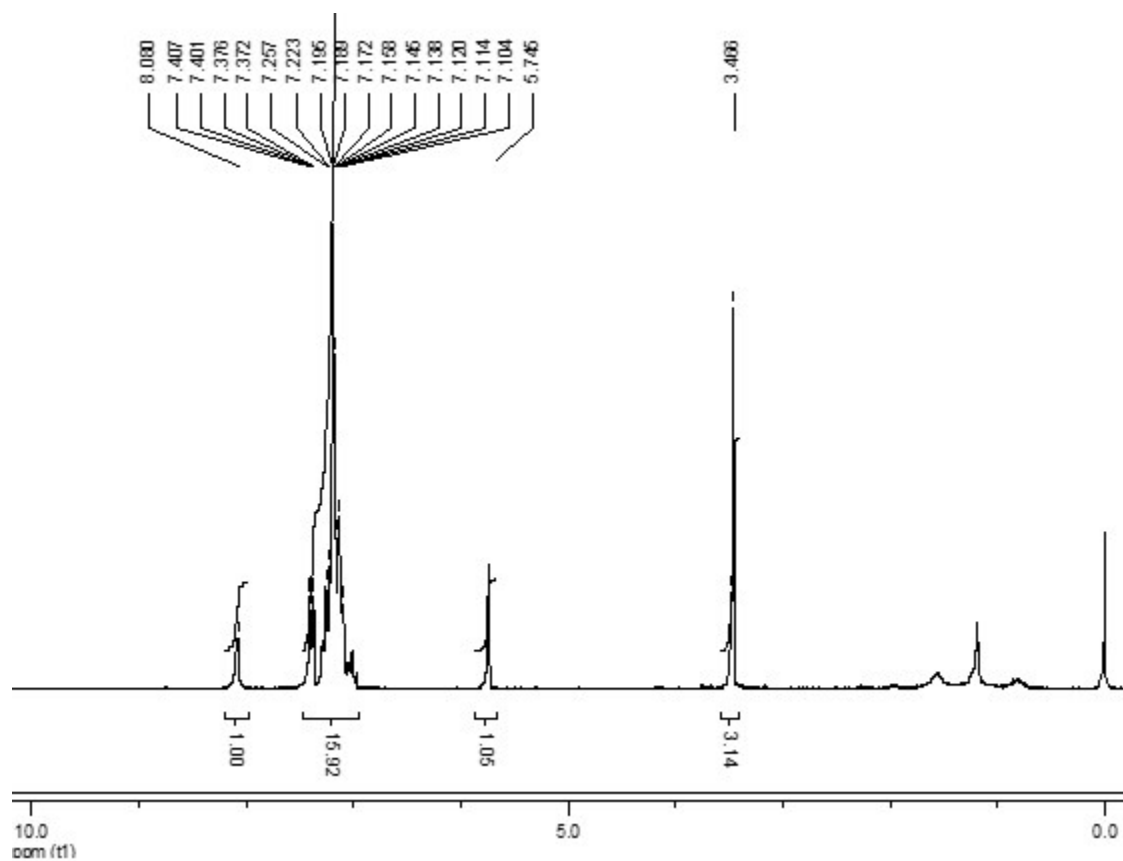

Fig. S13 The  $^1\text{H}$  NMR(250MHz)spectrum of product (9a)

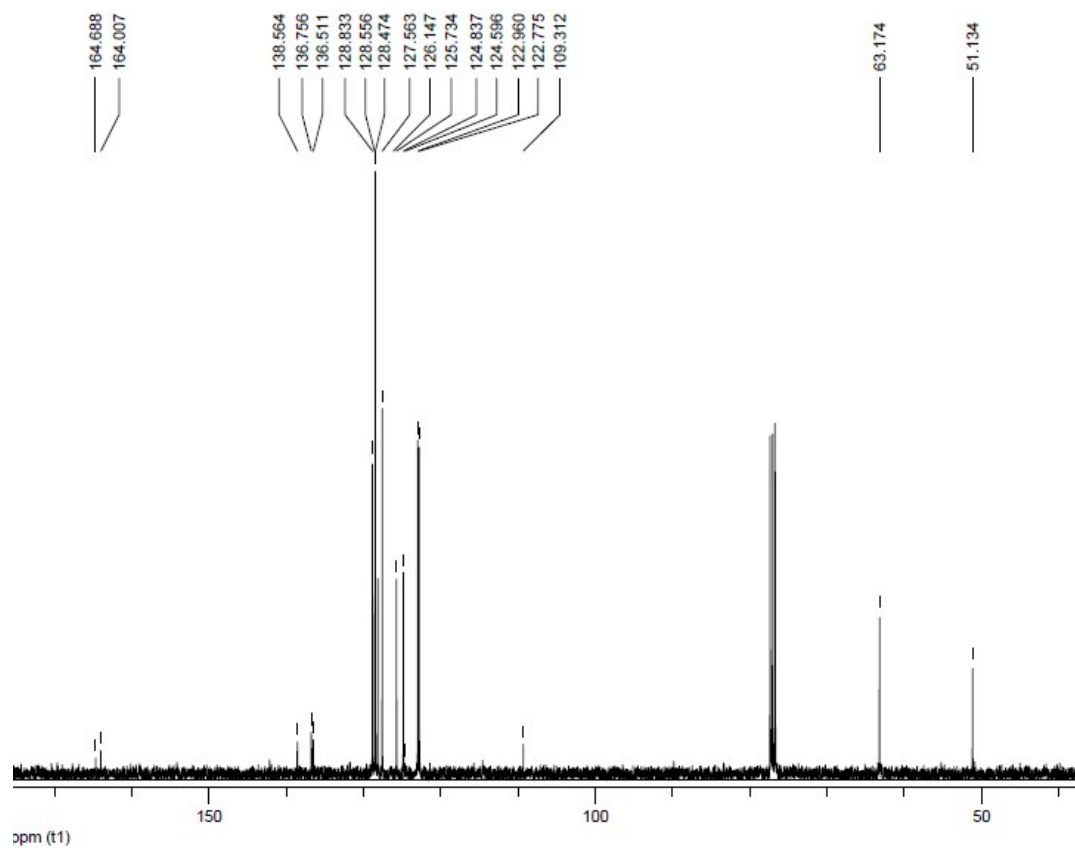

Fig. S14 The  $^{13}\text{C}$  NMR (100MHz) spectrum of product (9a)

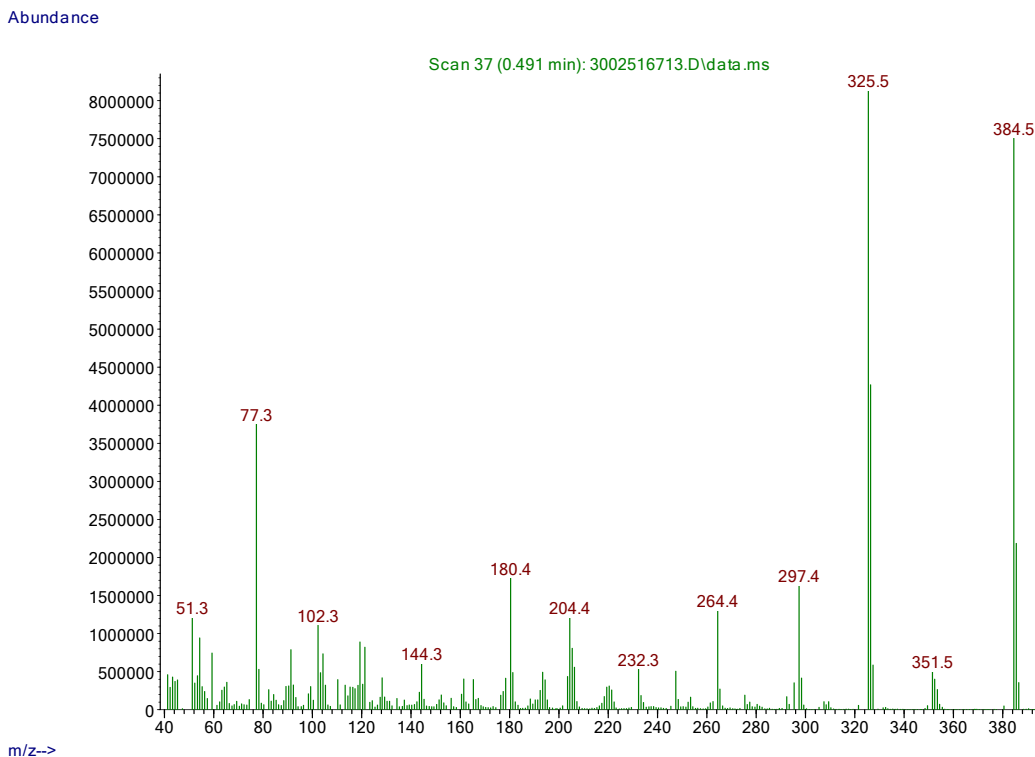

Fig. S15 The MS spectrum of product (9a)

**S11. Characterization data for Methyl 5-oxo-1-phenyl-4-(phenylamino)-2-(p-tolyl)-2,5-dihydro-1H-pyrrole-3-carboxylate 10a (Table 3, Entry 10):**

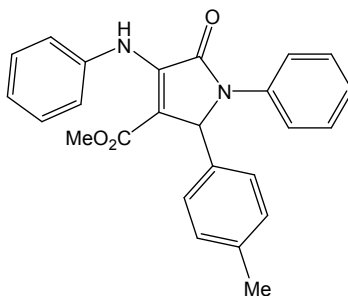

White solid, mp: 163-164 °C. FT-IR (KBr):  $\bar{\nu}$  (cm<sup>-1</sup>) 3283, 1674, 1648, 1554, 1538, 1440, 1373, 1266, 1150, 1094, 831. <sup>1</sup>H NMR (CDCl<sub>3</sub>, 250 MHz):  $\delta_H$  (ppm) 8.04 (br, s, 1H, NH), 7.41-6.98 (m, 14H, Ar-H), 5.71 (s, 1H, NCH), 3.47 (s, 3H, OCH<sub>3</sub>), 2.18 (s, 3H, Ar-Me). <sup>13</sup>C NMR (CDCl<sub>3</sub>, 100 MHz):  $\delta_C$  (ppm) 164.69, 164.05, 141.94, 138.66, 137.81, 136.51, 133.60, 129.22, 128.81, 128.46, 127.41, 125.65, 124.75, 122.86, 122.75, 109.53, 62.05, 51.13, 21.16. Elemental anal. Calcd (%) for C<sub>25</sub>H<sub>22</sub>N<sub>2</sub>O<sub>3</sub>: C, 75.36; H, 5.57; N, 7.03. Found: C, 75.35; H, 5.58; N, 7.01.

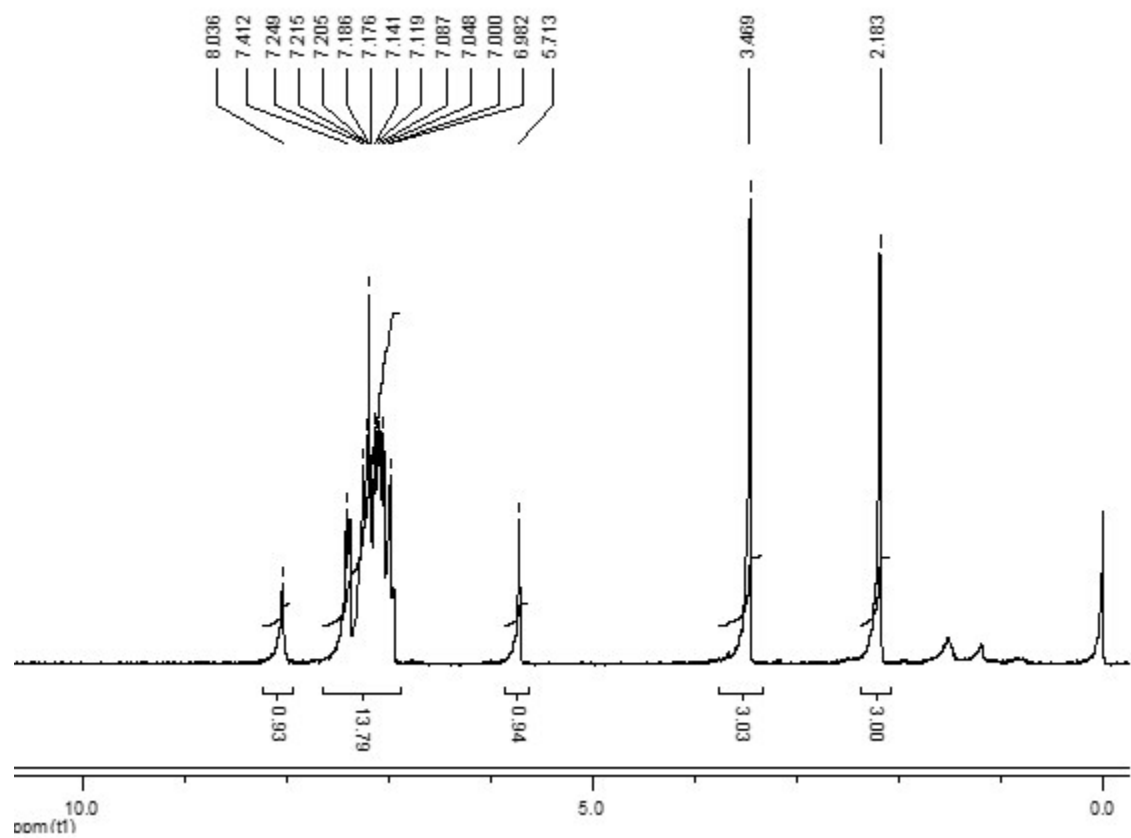

Fig. S16 The  $^1\text{H}$  NMR(250MHz)spectrum of product (10a)

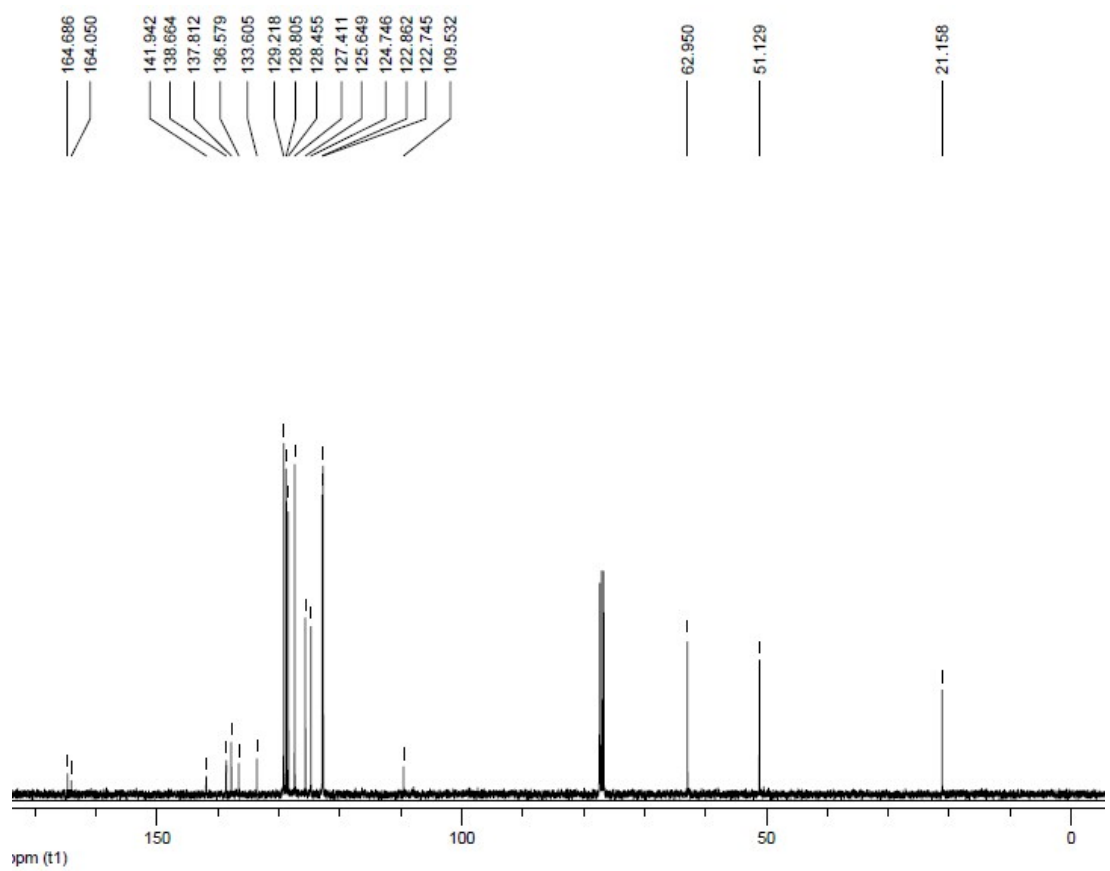

Fig. S17 The  $^{13}\text{C}$  NMR (100MHz) spectrum of product (10a)
